# Supplementary material for: A phase I study of combination vaccine treatment of five therapeutic epitope-peptides for metastatic colorectal cancer; safety, immunological response, and clinical outcome
Source: PubMed Central journal article supplement (PMC4007571; doi:10.1186/1479-5876-12-63), 2014-03-10
Supplement: 1479-5876-12-63-S2.pdf [file 1479-5876-12-63-S2.pdf]

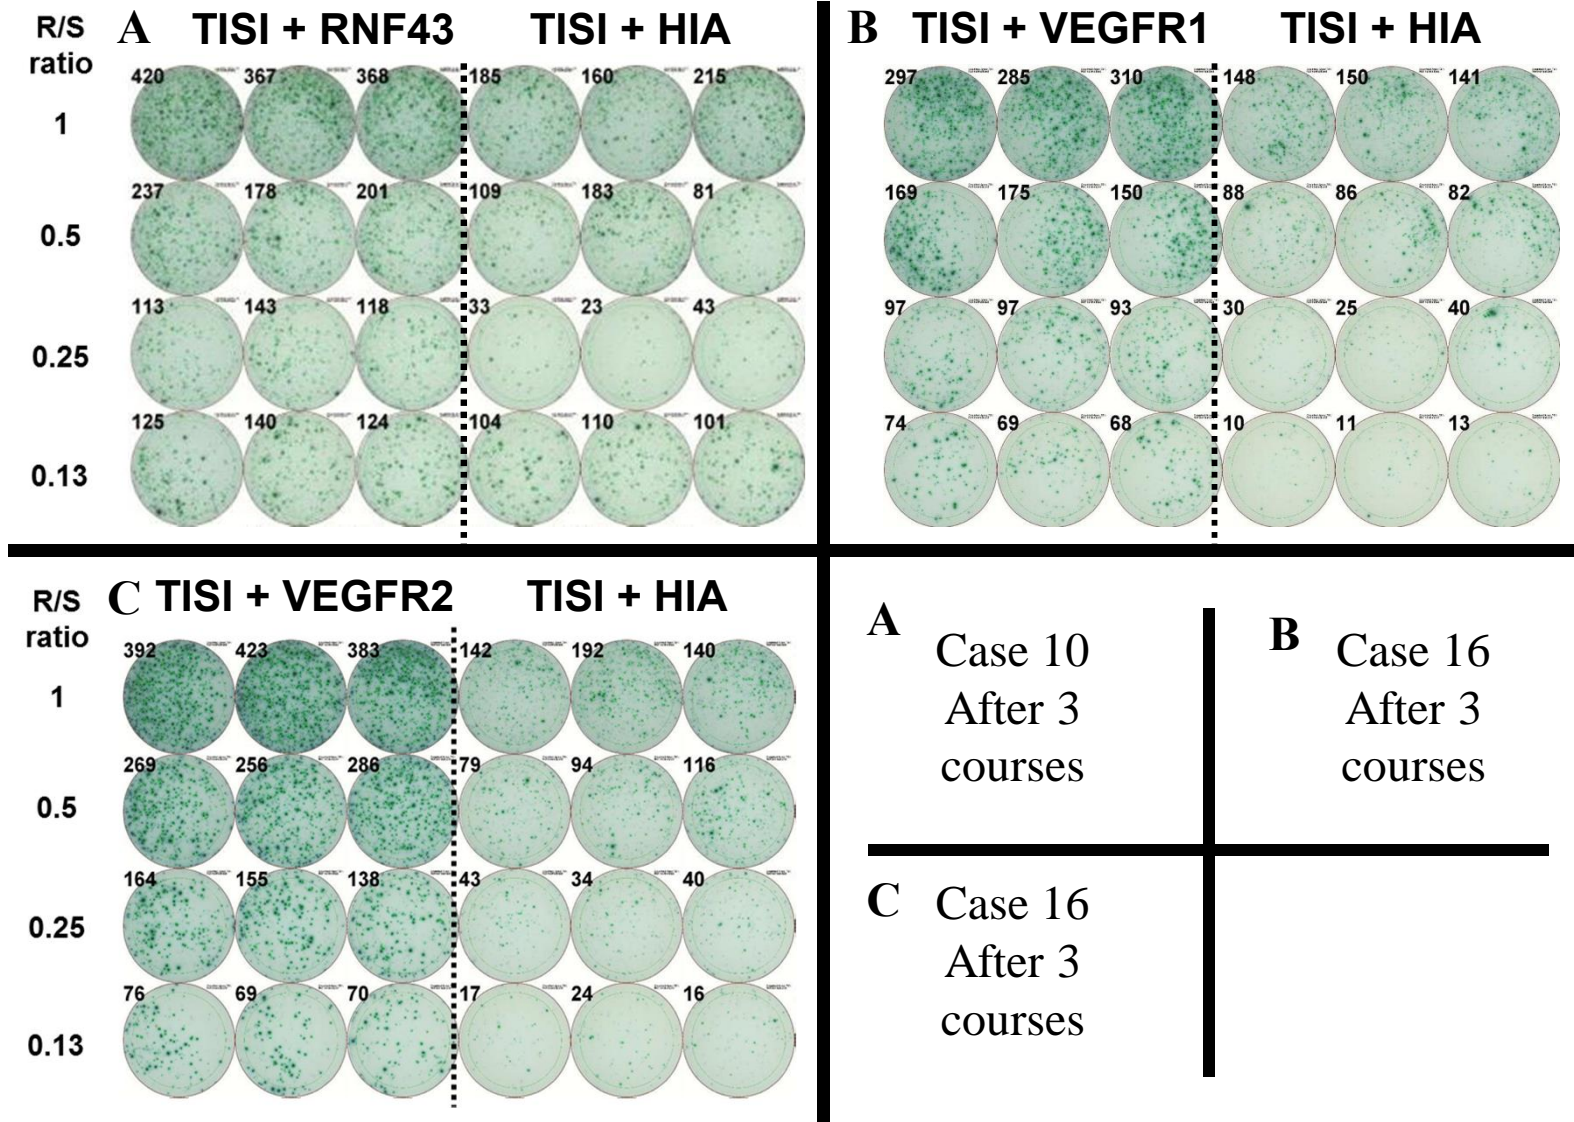

Supplemental Figure 2.

Representative immunologic monitoring assays detecting antigen-specific T-cell responses in patient 10 (A) and 16 (B, C), which were induced interferon- $\gamma$  (IFN- $\gamma$ )-producing cells. Positivity of antigen-specific T-cell response was quantitatively defined according to the evaluation tree algorithm (Supplemental Figure 1).
